# Supplementary material for: Disturbance of lipid metabolism in germ-free mice transplanted with gut microbiota of DSS-induced colitis mice
Source: PubMed Central journal article supplement (PMC9897547; doi:10.1371/journal.pone.0280850), 2023-02-03

### In Fig 2D

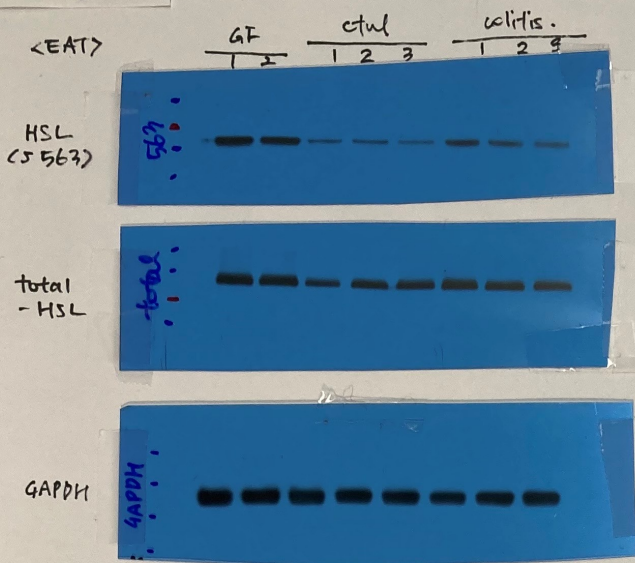

### In Fig 2D

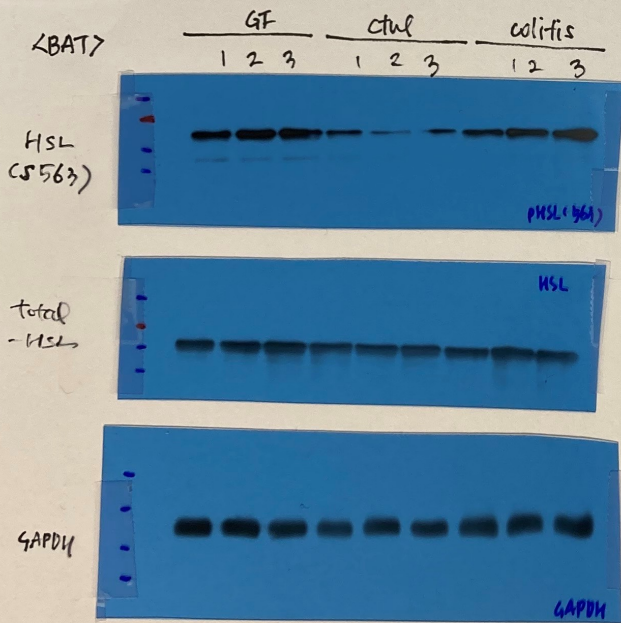

### In Fig 2G

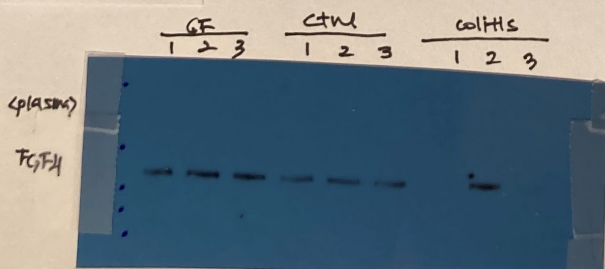

### In Fig 3P

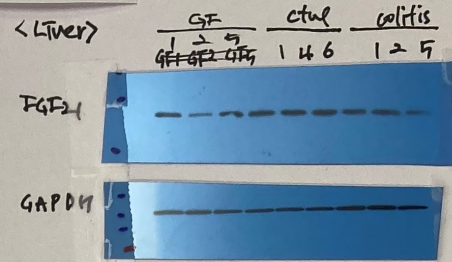

### In Fig 2I

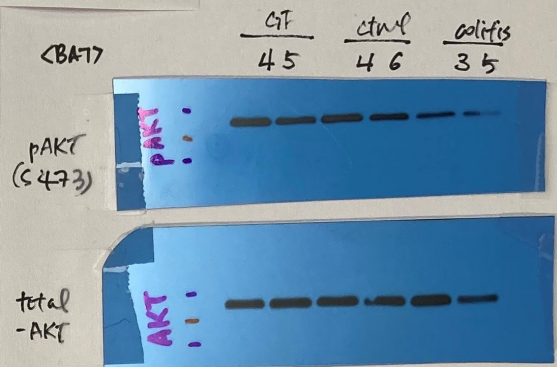

### In Fig 2I

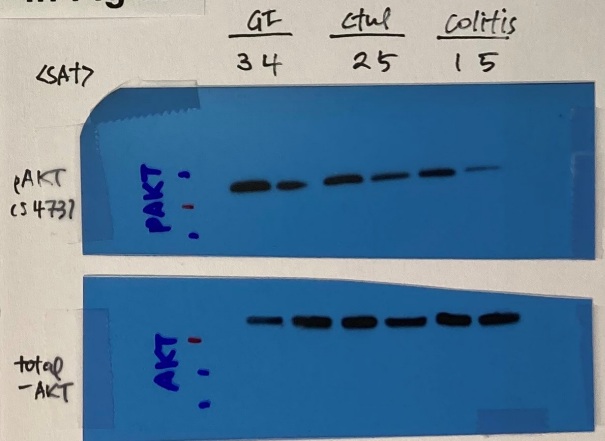

The way we obtained the blot images is as follows;

- 1) After electroblotting, we cut the blot membrane itself into strips. Referring to the position of the size marker, the region corresponding to the position of the protein of interest was cut out.
- 2) In a dark room, we pre-cut the X-ray film to approximately the size of the membrane strip (usually large enough to cover the membrane strip).
- 3) We placed the sheet of pre-cut film on top of the wrapped membrane in a cassette for exposure.



<EAT>

| GF |   |   | ctl |   |   | colitis. |   |   |
|----|---|---|-----|---|---|----------|---|---|
| 1  | 2 | 3 | 1   | 2 | 3 | 1        | 2 | 3 |

HSL  
(5563)

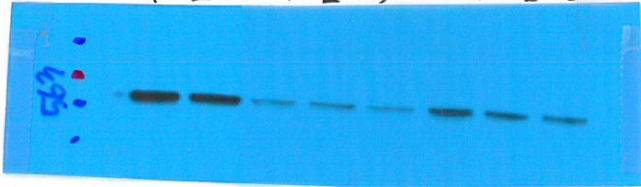

total  
-HSL

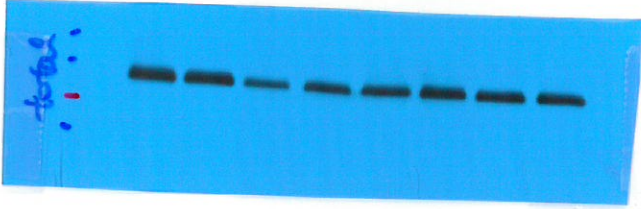

GAPDH

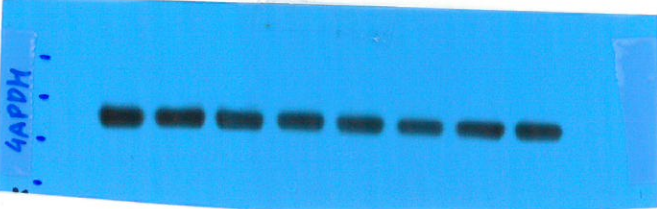

<BAT>

| GF |   |   | ctl |   |   | colitis |   |   |
|----|---|---|-----|---|---|---------|---|---|
| 1  | 2 | 3 | 1   | 2 | 3 | 1       | 2 | 3 |

HSL  
(5563)

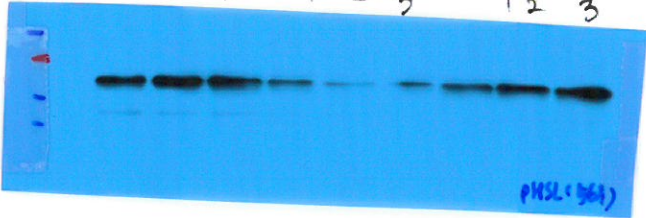

total  
-HSL

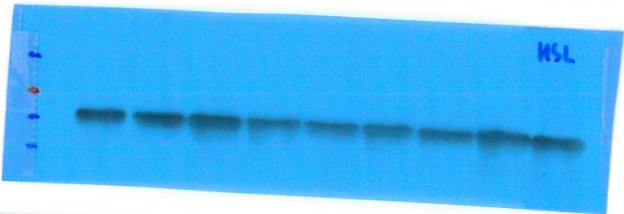

GAPDH

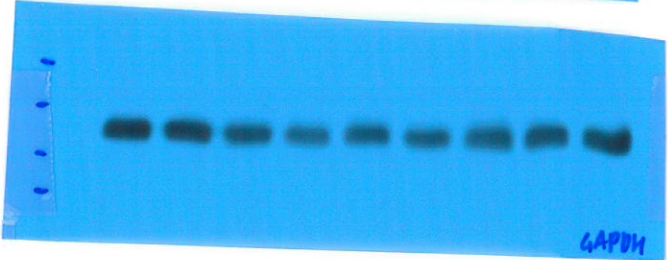

| GF |   |   | ctl |   |   | colitis |   |   |
|----|---|---|-----|---|---|---------|---|---|
| 1  | 2 | 3 | 1   | 2 | 3 | 1       | 2 | 3 |

plasma

FCγH

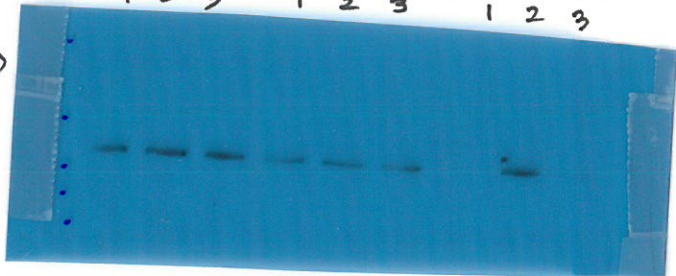

<Liver>

| GF                                          | ctul  | colitis |
|---------------------------------------------|-------|---------|
| 1 2 5                                       | 1 4 6 | 1 2 5   |
| <del>GF</del> <del>GF2</del> <del>GF5</del> |       |         |

FGF21

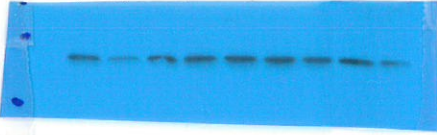

GAPDH

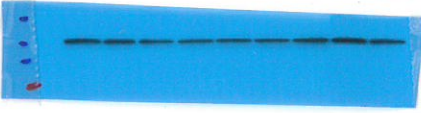

<BAT>

| GF  | ctul | colitis |
|-----|------|---------|
| 4 5 | 4 6  | 3 5     |

pAKT  
(S473)

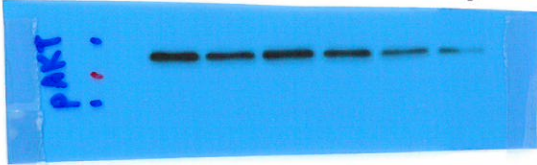

total  
-AKT

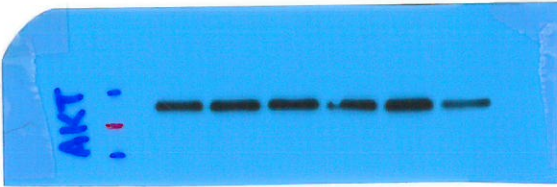

<SAT>

| GF  | ctul | colitis |
|-----|------|---------|
| 3 4 | 2 5  | 1 5     |

pAKT  
(S473)

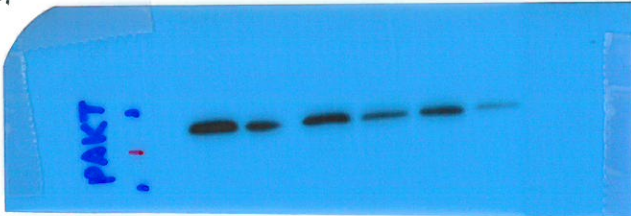

total  
-AKT

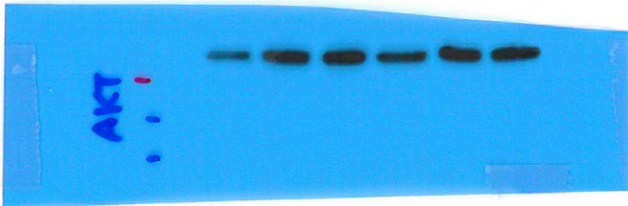

Supplement: pone.0280850.s006.pdf [file pone.0280850.s006.pdf]
